# Supplementary material for: Wheat Grain Width: A Clue for Re-Exploring Visual Indicators of Grain Weight
Source: Research Square preprint supplement (doi:10.21203/rs.3.rs-1098292/v1), 2021-11-29
Supplement: Supplementary file 1 [file 55b2bb645f24c2a66dc03171.xlsx]

## Sheet: Table 3
Table 3. Cross-validation and parameters of the linear models developed for estimation of mean grain weight (MGW; mg) using image-derived indices.
Indices	Original resolution (pixel)				Enhanced resolution (pixel)				SI (mm/ or mm2)				Cross-validation		RES-based RMSE improvement (%)
	Slope	Intercept	R2	RMSE	Slope	Intercept	R2	RMSE	Slope	Intercept	R2	RMSE	Overall RMSE	Micro average RMSE
Area	0.687608	-14.1307	0.76388	1.39916	0.00724173	-11.9638	0.819658	1.22279	3.45465	-10.5056	0.819658	1.22279	1.218 +/- 0.165	1.228 +/- 0.000	12.6059
Minor	11.4739	-40.0407	0.772601	1.37308	1.20627	-38.9224	0.847813	1.12329	26.2235	-37.4355	0.850126	1.11472	1.117 +/- 0.121	1.123 +/- 0.000	18.1921
MinFeret	11.4792	-47.2842	0.780236	1.34983	1.18545	-39.7778	0.838867	1.15583	25.751	-38.2153	0.840907	1.14849	1.150 +/- 0.134	1.157 +/- 0.000	14.3723
Area/perim.	43.0884	-56.757	0.79571	1.30144	4.58045	-53.5789	0.876262	1.01287	98.9301	-51.2263	0.87592	1.01427	1.011 +/- 0.143	1.020 +/- 0.000	22.1733
Area×Circ.	0.78101	-9.19948	0.795774	1.30124	0.00915677	-7.64874	0.878597	1.00327	4.38659	-6.50285	0.878413	1.00403	1.001 +/- 0.135	1.009 +/- 0.000	22.8991
Minor/Solidity	11.3002	-47.7881	0.785583	1.33331	1.18931	-40.2044	0.837085	1.1622	25.8452	-38.6638	0.839609	1.15317	1.157 +/- 0.126	1.163 +/- 0.000	12.8333
MinF/Solidity	11.244	-55.2463	0.783589	1.3395	1.16628	-40.905	0.825921	1.20137	25.3267	-39.2959	0.828246	1.19332	1.196 +/- 0.139	1.203 +/- 0.000	10.3121
Area×Solidity	0.73673	-12.0381	0.770164	1.38042	0.0074171	-11.6267	0.829833	1.18779	3.53909	-10.189	0.829547	1.18879	1.183 +/- 0.158	1.193 +/- 0.000	13.9543
Perim.×Circ.	3.37904	-54.7926	0.792526	1.31155	0.359924	-51.6694	0.8765	1.0119	7.78045	-49.4411	0.876439	1.01215	1.011 +/- 0.121	1.017 +/- 0.000	22.8471
A1 (Area×Perim.×Circ.×Solidity×MinF)	0.00175794	13.5629	0.799611	1.28896	2.15043e-07	14.3933	0.869148	1.04158	0.0505571	15.011	0.868527	1.04405	1.038 +/- 0.149	1.047 +/- 0.000	19.192
A2 (Area×Perim.×Circ.×Solidity×Minor)	0.00188066	14.0637	0.800268	1.28685	2.21284e-07	14.3904	0.874823	1.01874	0.0520301	15.0057	0.874153	1.02147	1.016 +/- 0.143	1.025 +/- 0.000	20.8341
Kim index	0.130698	-1.60504	0.764402	1.39762	0.000324975	0.03999	0.820012	1.22159	1.12642	1.14379	0.82002	1.22156	1.216 +/- 0.164	1.226 +/- 0.000	12.5949
MinF, Perim., and Circ. are minimum Feret diameter, perimeter, and circularity, respectively. Original resolution, enhanced resolution, and also SI are the various scales of the image dimension based on which the analyses have been carried out. The output slopes and intercepts of cross-validation were exactly the same as the SI parameters (noteworthy, the cross-validation was conducted using all …
